# Supplementary material for: Hyaluronan and Derivatives: An In Vitro Multilevel Assessment of Their Potential in Viscosupplementation
Source: MDPI journal article supplement (doi:10.3390/polym13193208), 2021-09-22
Supplement: s1 [file s1]

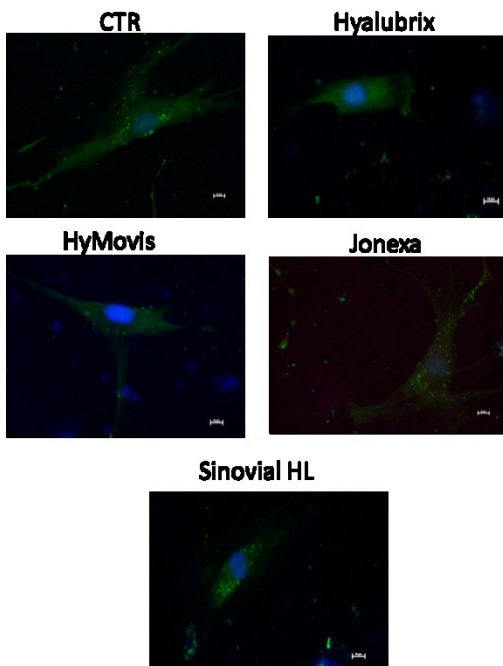

**Figure S1 a.** Immunofluorescence staining of COMP-2 in treated and untreated primary human chondrocytes. In the blue nuclei, a fitc-green antibody was used for COMP-2. Pictures are from one representative experiment. Magnification 40X.

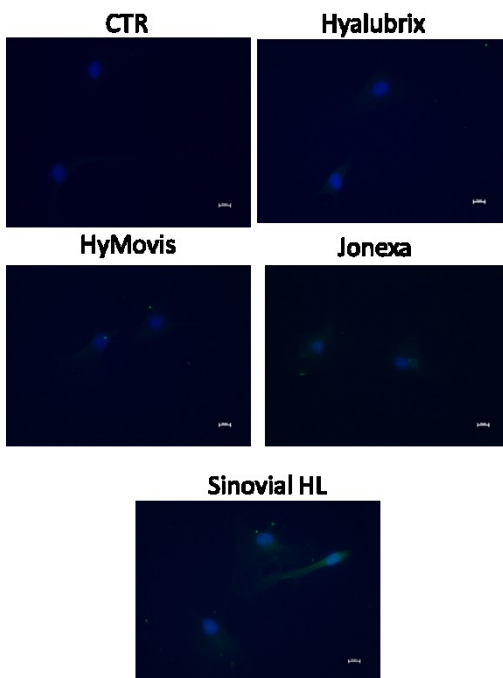

**Figure S1 b.** Immunofluorescence staining of HAS-1 in treated and untreated primary human synoviocytes. In the blue nuclei, a fitc-green antibody was used for HAS-1. Pictures are from one representative experiment. Magnification 40X.
